# Supplementary material
Source: Springer Nature journal article supplement (https://www.springermedizin.de/resource/supplementary/12889_2014_6536_MOESM2_ESM.pdf/9498484)
Supplement: MOESM2 [file 9498484]

**Additional table 2. Comparisons of health-related quality of life (HRQoL) between data collections 2005 and 2009.**

| HRQoL <sup>1</sup>            | HRQoL in the ETICS-study<br>mean±SD |                   | Comparison of the years |                        |
|-------------------------------|-------------------------------------|-------------------|-------------------------|------------------------|
|                               | 2005 <sup>2</sup>                   | 2009 <sup>2</sup> | P-value <sup>3</sup>    | Cohen's d <sup>4</sup> |
| Physical well-being           | 77.7±16.0                           | 78.5±15.5         | 0.005                   | 0.05                   |
| Psychological well-being      | 81.9±14.8                           | 83.1±14.5         | <0.0001                 | 0.08                   |
| Moods and emotions            | 83.3±16.4                           | 84.0±16.3         | 0.001                   | 0.05                   |
| Self-perception               | 80.5±18.0                           | 80.4±19.0         | 0.212                   | -                      |
| Autonomy                      | 80.8±15.6                           | 81.6±16.0         | <0.0001                 | 0.05                   |
| Parent relation and home life | 86.6±14.8                           | 87.4±14.7         | <0.0001                 | 0.06                   |
| Financial resources           | 82.5±20.4                           | 83.8±20.2         | <0.0001                 | 0.07                   |
| Social support and peers      | 80.1±15.3                           | 81.0±15.7         | <0.0001                 | 0.06                   |
| School environment            | 75.5±16.9                           | 77.6±17.3         | <0.0001                 | 0.12                   |
| Social acceptance (bullying)  | 91.9±14.9                           | 92.2±14.4         | 0.570                   | -                      |

<sup>1</sup> HRQoL was assessed with the Kidscreen-52 instrument, comprising 10 subdomains of HRQoL.

<sup>2</sup> Years of the data collection in the ETICS-study; 2005 n=7 152 and 2009 n=5 267

<sup>3</sup> Comparisons between the years using Mann-Whitney U-test.

<sup>4</sup> Cohen's d estimated as the difference in mean divided by the pooled SD, and interpreted as small if below 0.2.
